# Supplementary material for: Well-graphitized graphene as photoinduced charge transport channel for improving the photocatalytic activity of AgBr
Source: Royal Society of Chemistry journal article supplement (doi:10.1039/c3nj00188a), 2013-01-01
Supplement: c3nj00188a.pdf [file c3nj00188a.pdf]

## Supporting Information

# Well Graphitized Graphene as Photoinduced Charge Transport Channels for Improving the Photocatalytic Activity of AgBr

Junfei Liang, Huang Wang, Lin Guo\* and Li-Dong Li\*

Key Laboratory of Bio-Inspired Smart Interfacial Science and Technology of Ministry of Education School of Chemistry & Environment, Beihang University, Beijing, 100191, P. R. China. E-mail: guolin@buaa.edu.cn, lilidong@buaa.edu.cn; fax:010-82338162; Tel.:010-82338162

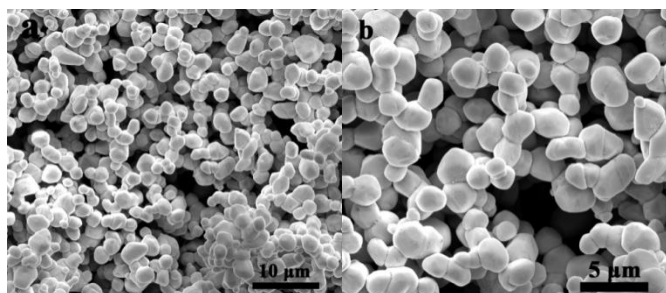

Fig. S1. SEM images of AgBr particles at low (a) and high magnifications (b).

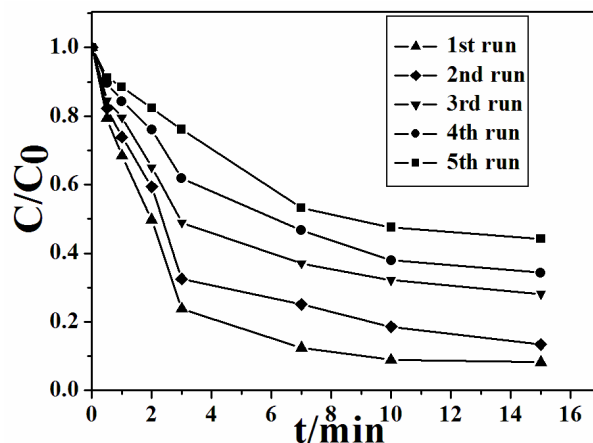

Fig. S2 Photocatalytic oxidation of MO over the AgBr-WGG with different cycling runs

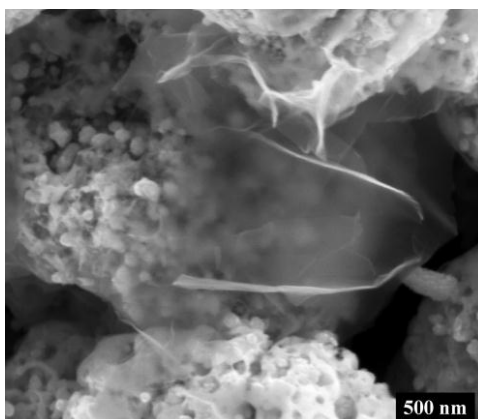

Fig. S3 SEM images of the AgBr-WGG after the photodegradation
